# Supplementary material for: Porous Fe0/C ceramsites for removal of aqueous Pb(ii) ions: equilibrium, long-term performance and mechanism studies
Source: Royal Society of Chemistry journal article supplement (doi:10.1039/c8ra05164j), 2018-01-01
Supplement: c8ra05164j1.pdf [file c8ra05164j1.pdf]

## Supplementary Information for

Porous Fe<sup>0</sup>/C ceramsites for removal of aqueous Pb(II) ions:  
equilibrium, long-term performance and mechanism studies

Pingfeng Fu\*, Xiaofeng Lin, Zihao Chen

*<sup>a</sup> School of Civil and Resources Engineering, University of Science and Technology  
Beijing, Beijing 100083, China.*

Corresponding author (P.F. Fu): E-mail: pffu@ces.ustb.edu.cn

**Table S1** Physical and chemical parameters of fabricated Fe<sup>0</sup>/C ceramsites

| Parameters                          | Values |
|-------------------------------------|--------|
| Metallic iron content (%)           | 51.18  |
| Carbon content (%)                  | 6.82   |
| Fe/C mass ratio                     | 7.5:1  |
| Grain density (g cm <sup>-3</sup> ) | 1.76   |
| Porosity (vol.%)                    | 46.37  |
| Compressive strength (MPa)          | 53.9   |



**Fig. S1** Fabrication procedure for Fe<sup>0</sup>/C ceramsites



**Fig. S2** Photograph of fabricated Fe<sup>0</sup>/C ceramsites



**Fig. S3** Variations of adsorption capacity ( $q_e$ ) with Pb(II) concentration at equilibrium ( $C_e$ ) by Fe<sup>0</sup>/C ceramsite



**Fig. S4** Photograph of Fe<sup>0</sup>/C ceramsites after the Pb(II) removal for 12 days. White coating in particles (1) and (2) is lead oxides, and red coating in particles (2) and (3) is iron hydroxides.
